# Supplementary material for: Detection of lipase activity in human serum based on a ratiometric fluorescent probe
Source: Royal Society of Chemistry journal article supplement (doi:10.1039/d1nj01155c), 2021-01-01

### Detection of lipase activity in human serum based on a ratio fluorescent probe

Jiajie Luo <sup>a,†</sup>, Hongyi Zhang <sup>a,†</sup>, Jialiang Guan <sup>b</sup>, Baoshuai An <sup>a</sup>, Junli Peng <sup>a</sup>, Wei Zhu <sup>a</sup>, Ningning Wei <sup>a,\*</sup> and Yanru Zhang <sup>a,\*</sup>

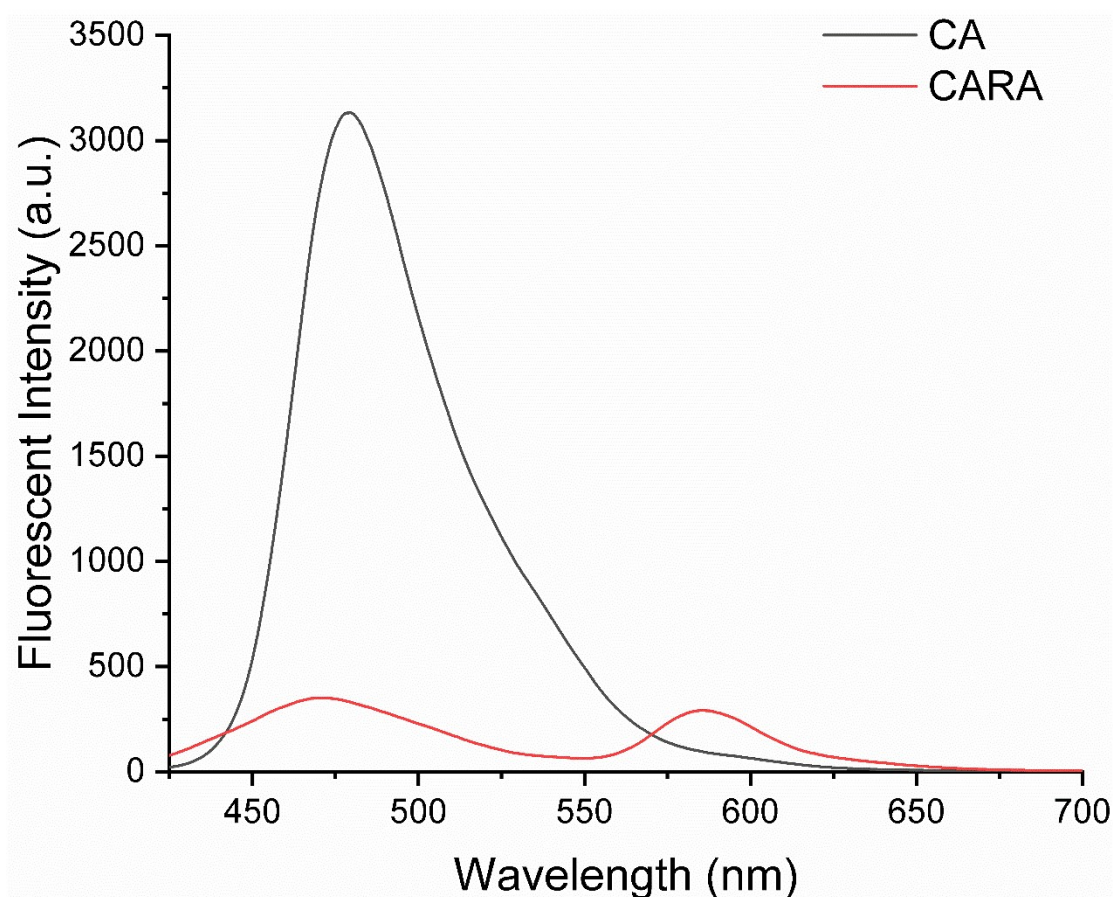

Fig. S1. Fluorescent emission spectra of CA (10  $\mu$ M) and CARA (10  $\mu$ M) with excitation at 405 nm. FRET efficiency =  $(I_{CA(470\text{ nm})} - I_{CARA(470\text{ nm})}) / I_{CA(470\text{ nm})} \times 100\% = 88.8\%$ .  $I_{CA(470\text{ nm})}$  represents the fluorescent intensity of CA at 470 nm with excited at 405 nm,  $I_{CARA(470\text{ nm})}$  represents the fluorescent intensity of CARA at 470 nm with excited at 405 nm.

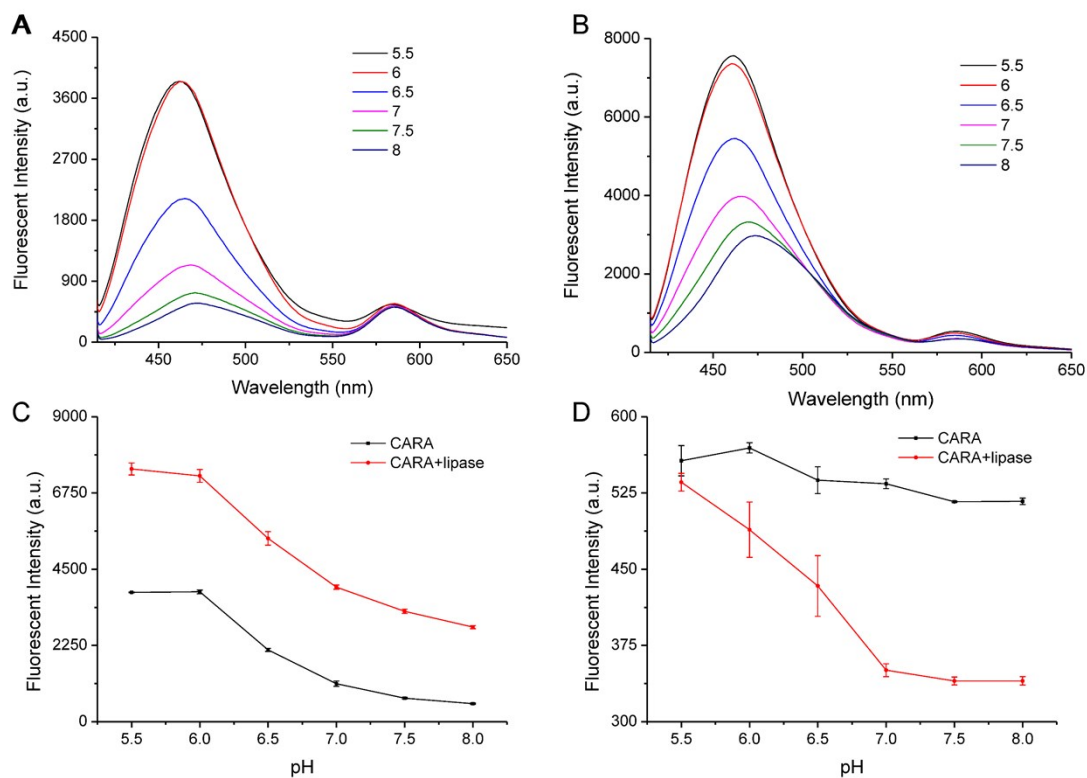

Fig. S2. The fluorescent spectra of CARA in the absence (A) or presence (B) of lipase at pH values ranging from 5.5 to 8.0. The fluorescent intensity of CARA (the black line) and CARA + lipase (the red line) at 470nm (C) and 585nm (D).

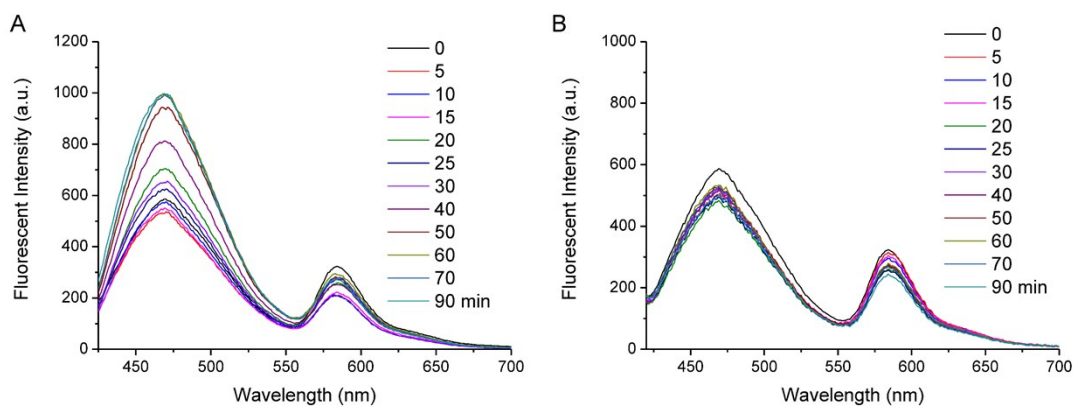

Fig. S3. The fluorescent spectra of CARA (10 μM) in the presence (A) or absence (B) of lipase in PBS (pH 7.2) at 37 °C for 0-90 min, which were got at 0, 5, 10, 15, 20, 25, 30, 40, 50, 60, 70, 90 minutes.

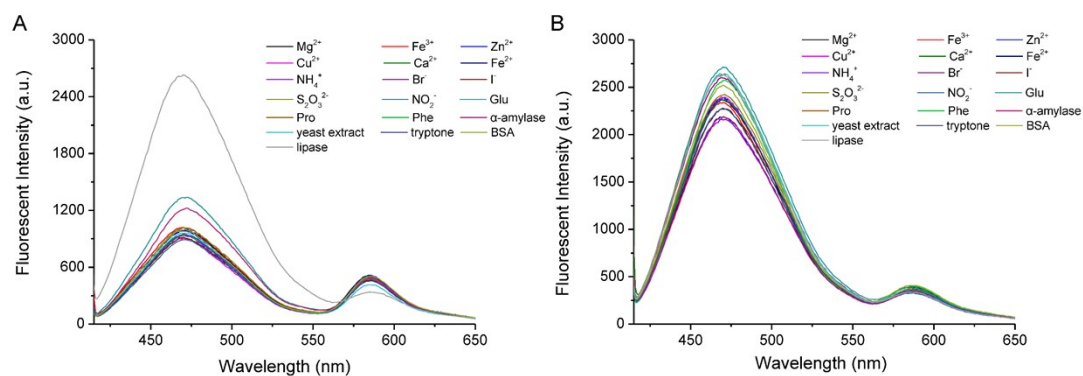

Fig. S4. (A) Fluorescent spectra of CARA (10  $\mu$ M) toward lipase and other biological substances including  $Mg^{2+}$ ,  $Zn^{2+}$ ,  $Br^-$ ,  $Cu^{2+}$ ,  $Fe^{2+}$ ,  $NO_2^-$ ,  $Fe^{3+}$ ,  $Ca^{2+}$ ,  $NH_4^+$ ,  $S_2O_3^{2-}$ ,  $I^-$ , Phe, Pro, Glu,  $\alpha$ -amylase, tryptone, yeast extract, BSA in PBS (pH 7.2). (B) Fluorescent spectra of CARA (10  $\mu$ M) toward coexistence of lipase and other biological substances including  $Mg^{2+}$ ,  $Zn^{2+}$ ,  $Br^-$ ,  $Cu^{2+}$ ,  $Fe^{2+}$ ,  $NO_2^-$ ,  $Fe^{3+}$ ,  $Ca^{2+}$ ,  $NH_4^+$ ,  $S_2O_3^{2-}$ ,  $I^-$ , Phe, Pro, Glu,  $\alpha$ -amylase, tryptone, yeast extract, BSA in PBS (pH 7.2).

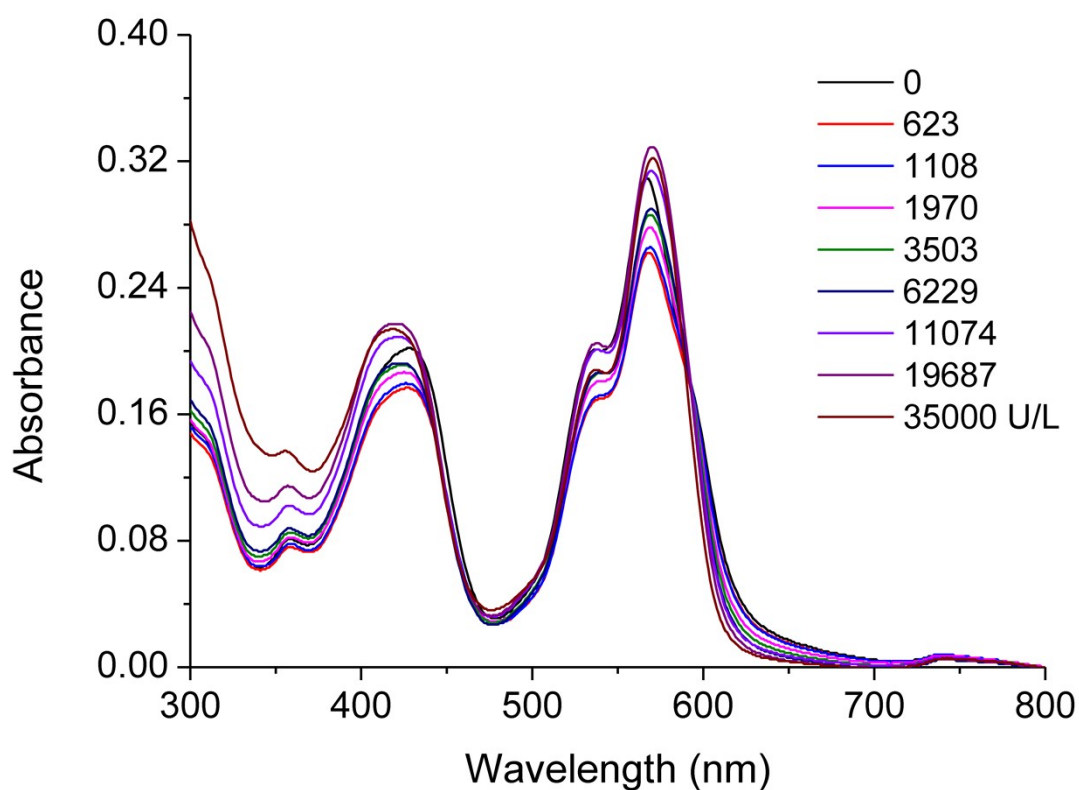

Fig. S5. The UV spectra of CARA (10  $\mu$ M) with different concentrations of lipase in PBS (pH 7.2).

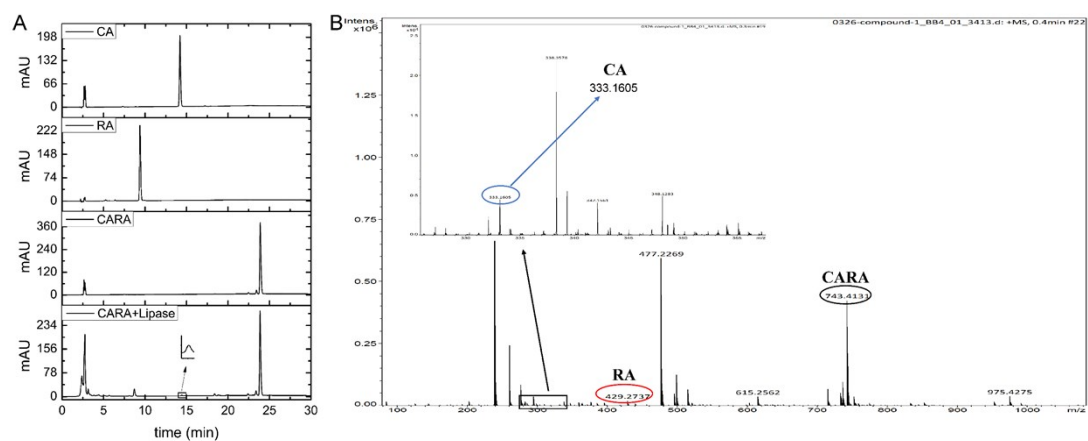

Fig. S6. HPLC (A) and HRMS (B) for the response mechanism of CARA to lipase analysis.

Table S1. Comparison of some sensors based on fluorometric and colorimetric methods for the analysis of lipase activity.

| Fluorescent probe                                      | Ex/Em        | Test Solvent System                              | Reference |
|--------------------------------------------------------|--------------|--------------------------------------------------|-----------|
| Quantum dots and the proximal substrate's dye          | 430/520, 573 | The aqueous assay buffer containing 10% v/v DMSO | 1         |
|                                                        |              | CPP                                              | 2         |
| TPE-c-CD and TPE-H                                     | 390/460      | The PBS buffer containing DMSO                   | 3         |
| P1 (TPE derivative)                                    | 350/425      | Hexane/PBS(v/v=1:1)                              | 4         |
| S1 (TPE derivative)                                    | 390/453      | Hexane/PBS (v/v=1:1)                             | 5         |
| dinitrophenylamino group pyrenebutyric acid monoesters | 300/376      | The PBS buffer containing 30% v/v DMSO           | 6         |
| This work                                              | 405/470, 585 | The PBS buffer containing 1% v/v DMSO            |           |

Reference:

1. J. C. Breger, K. Susumu, G. Lasarte-Aragones, S. A. Diaz, J. Brask and I. L. Medintz, *ACS sensors*, 2020, **5**, 1295-1304.
2. Z. Qiao, H. Zhang, Y. Zhang and K. Wang, *iScience*, 2020, **23**, 101294.
3. J. Shi, Q. Deng, Y. Li, Z. Zheng, H. Shangguan, L. Li, F. Huang and B. Tang, *Chemical communications*, 2019, **55**, 6417-6420.
4. J. Shi, S. Zhang, M. M. Zheng, Q. C. Deng, C. Zheng, J. Li and F. H. Huang, *Sensor Actuat B-Chem*, 2017, **238**, 765-771.
5. J. Shi, Q. C. Deng, C. Y. Wan, M. M. Zheng, F. H. Huang and B. Tang, *Chemical Science*, 2017, **8**, 6188-6195.
6. Y. Yang, P. Babiak and J.-L. Reymond, *Org Biomol Chem*, 2006, **4**, 1746-1754.

# The NMR and HR-MS spectra

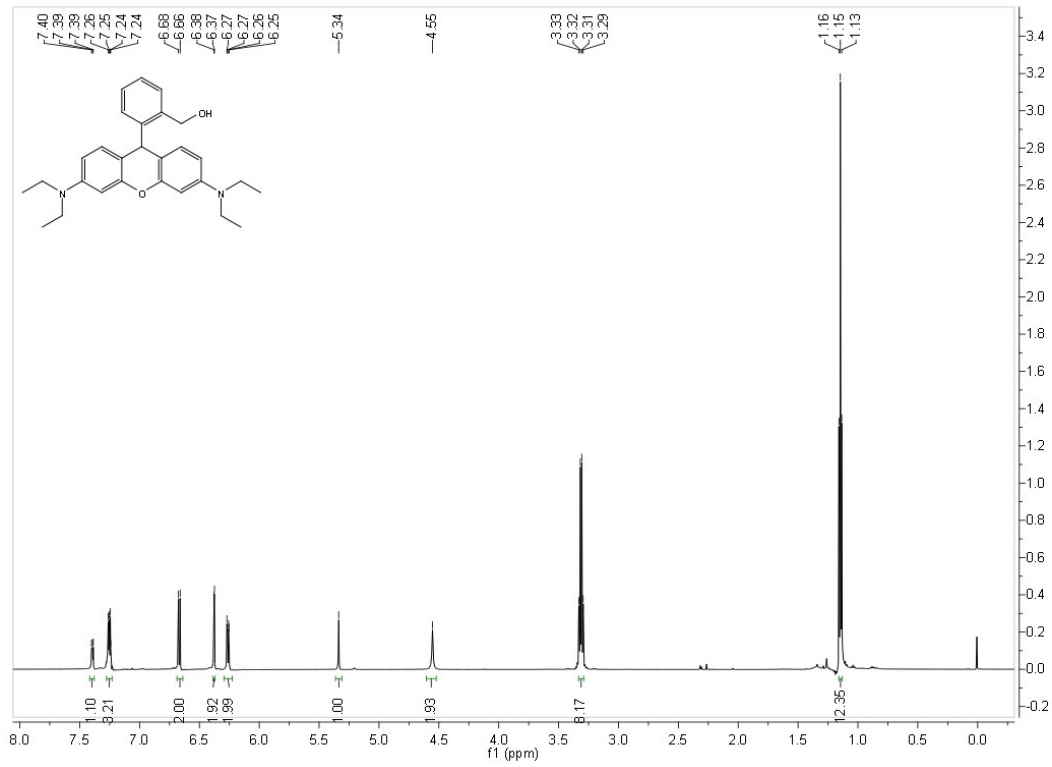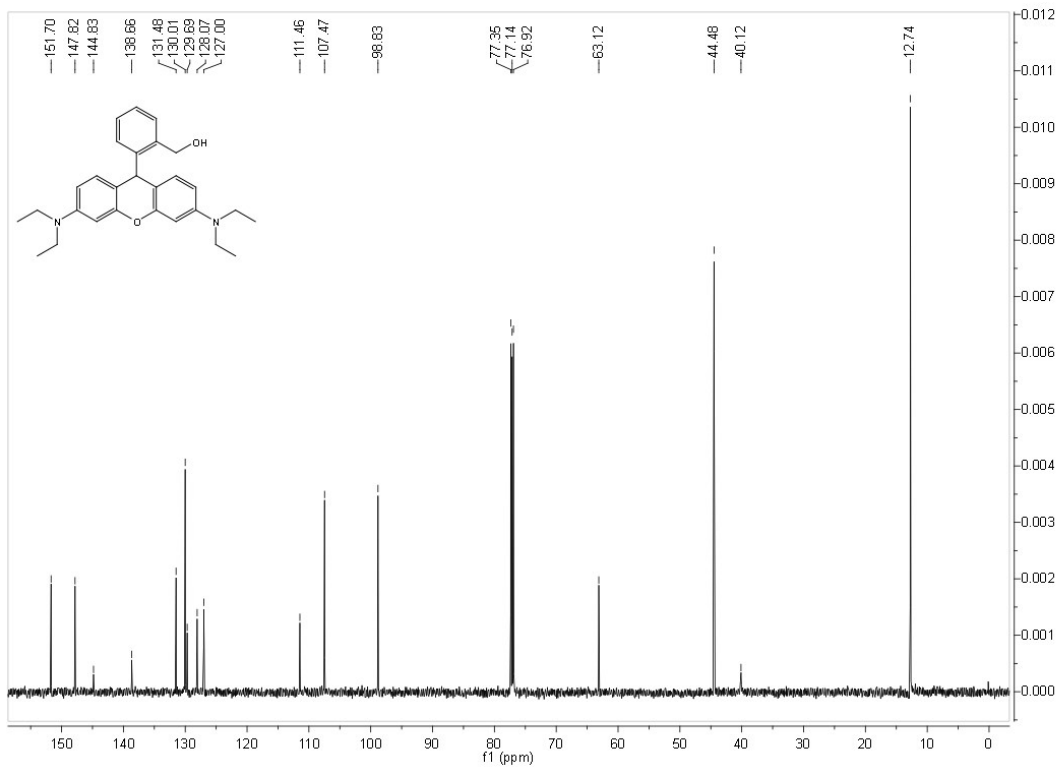

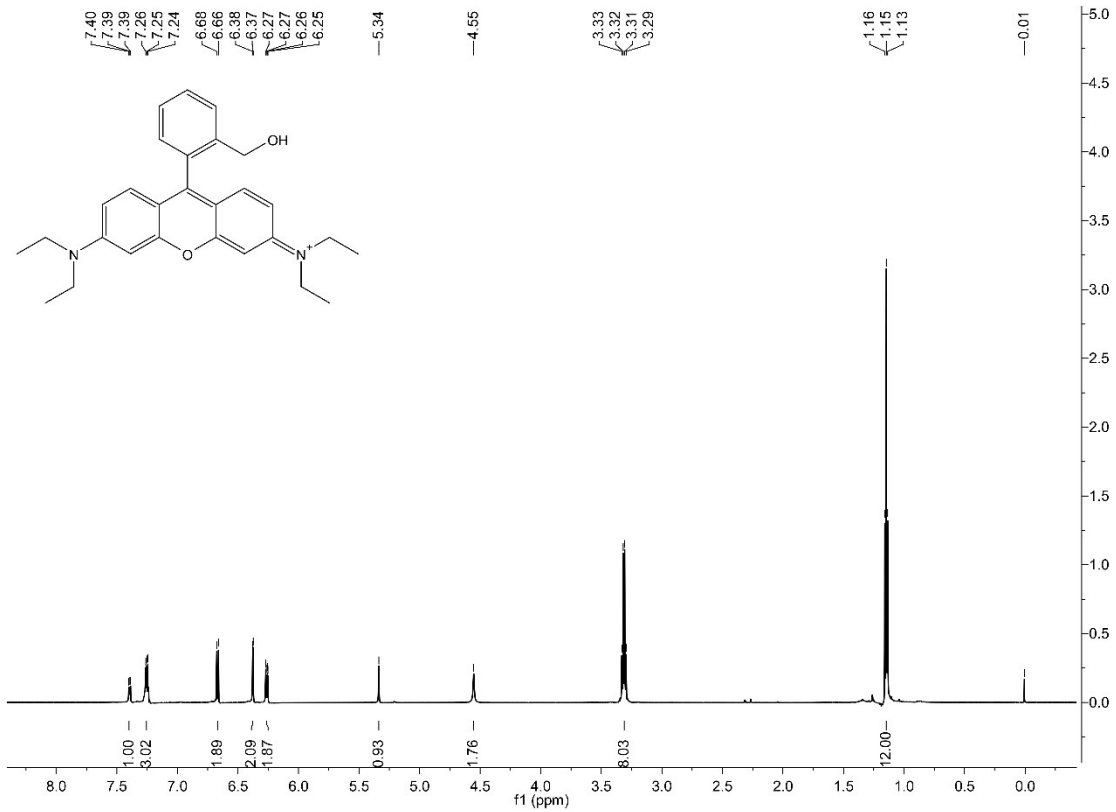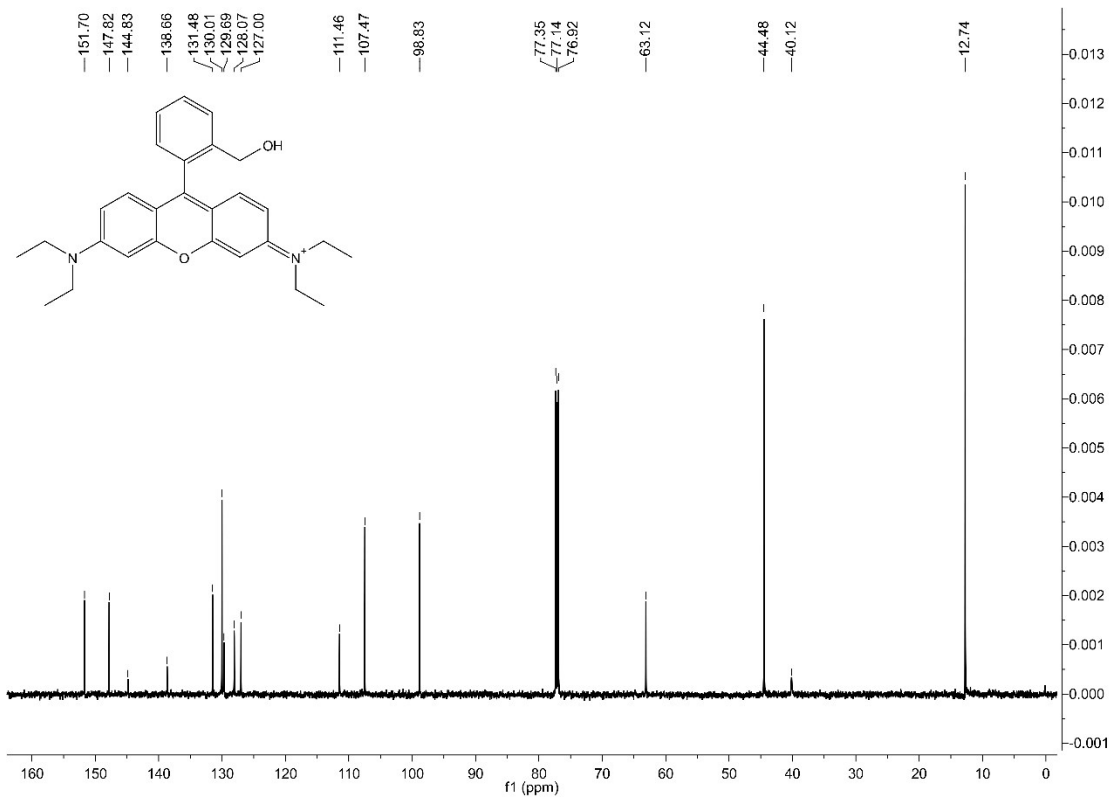

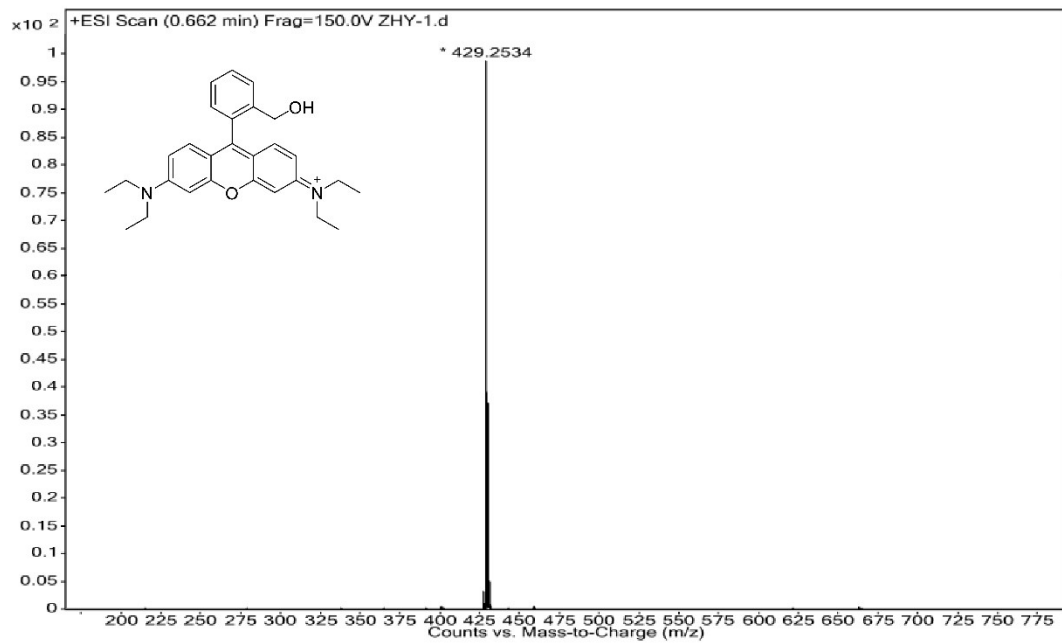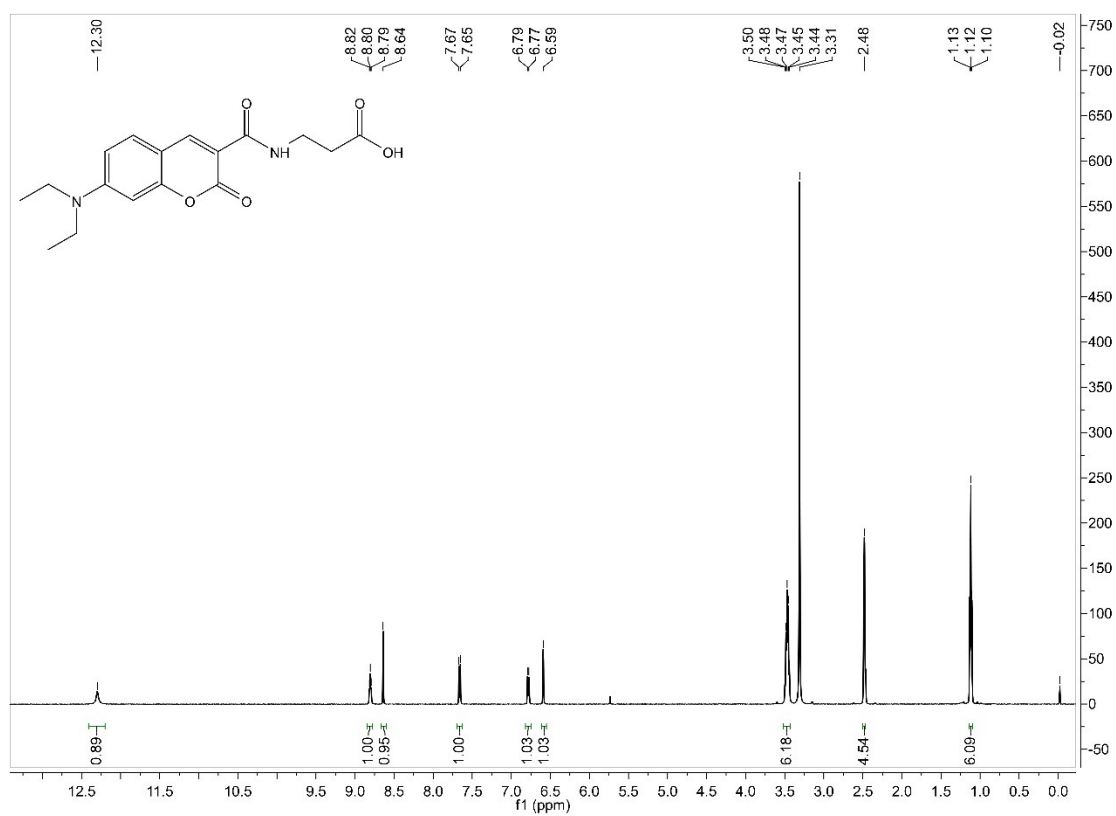



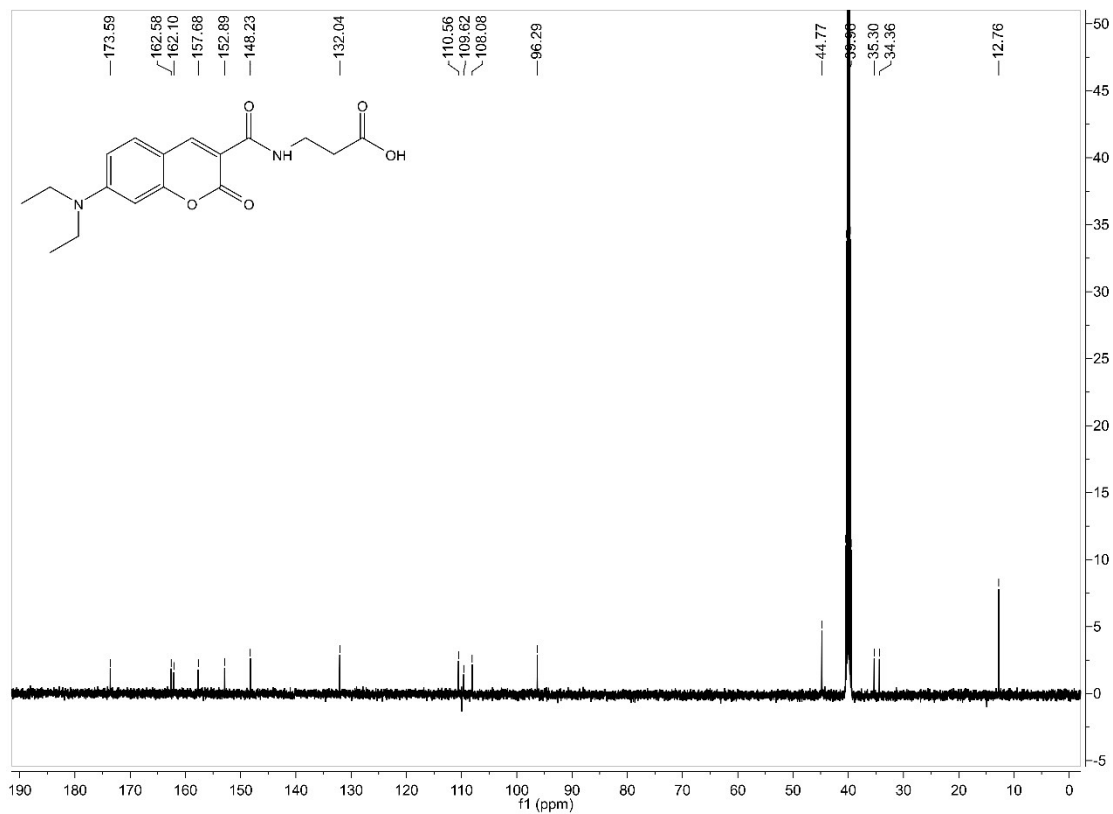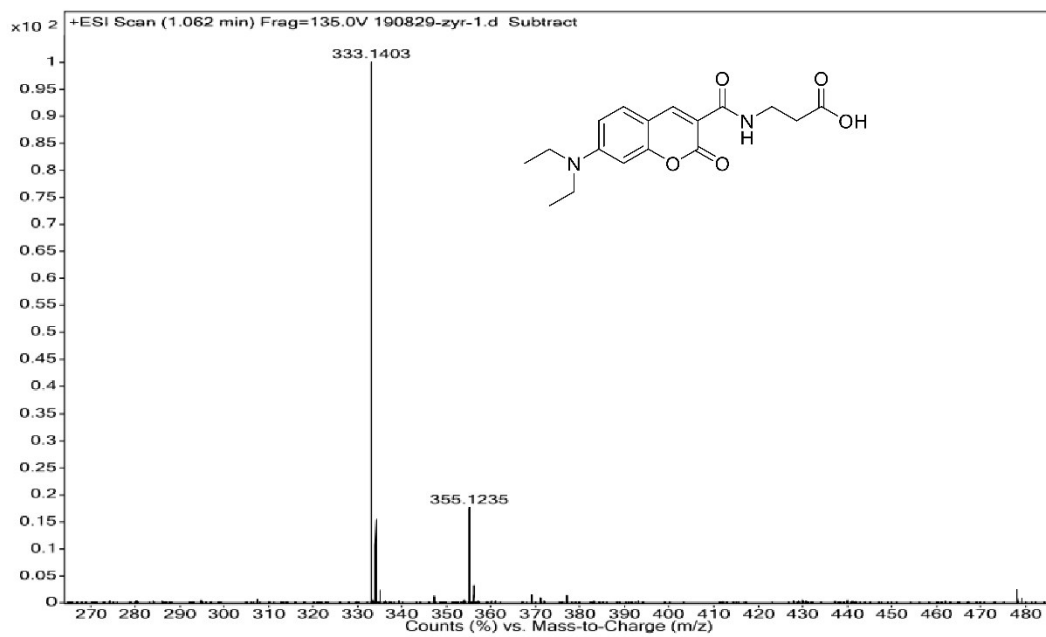

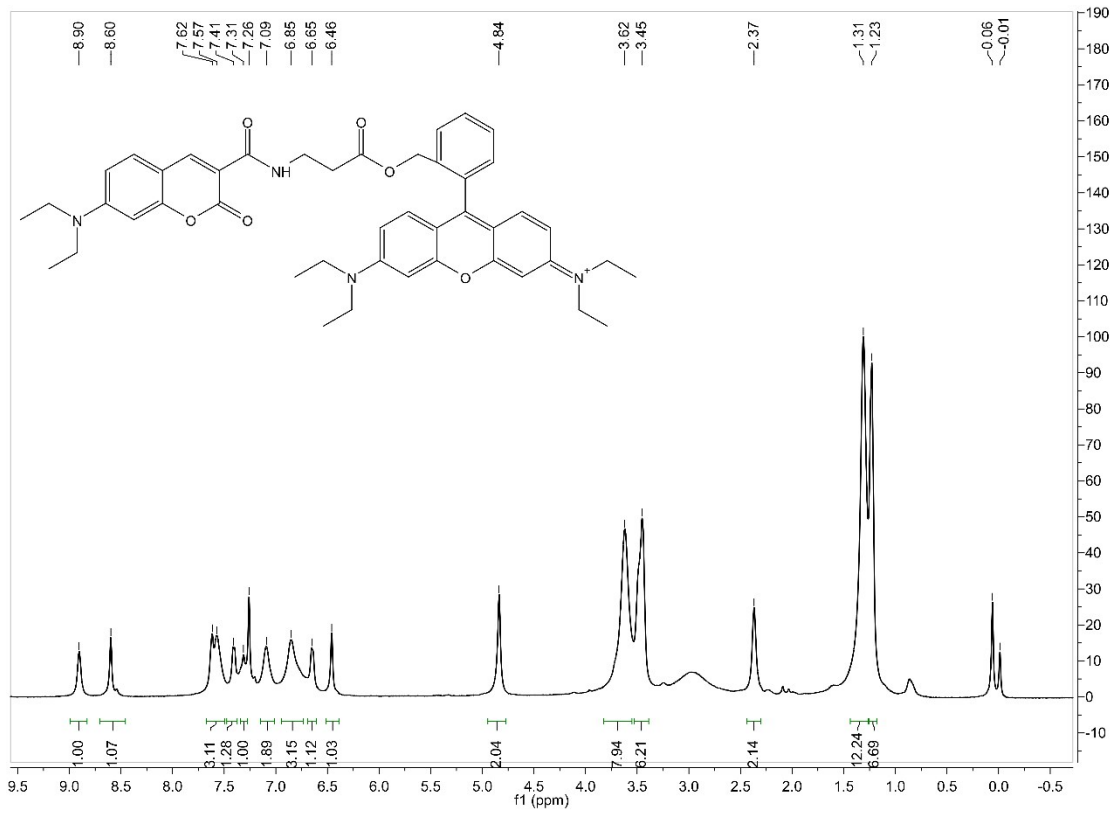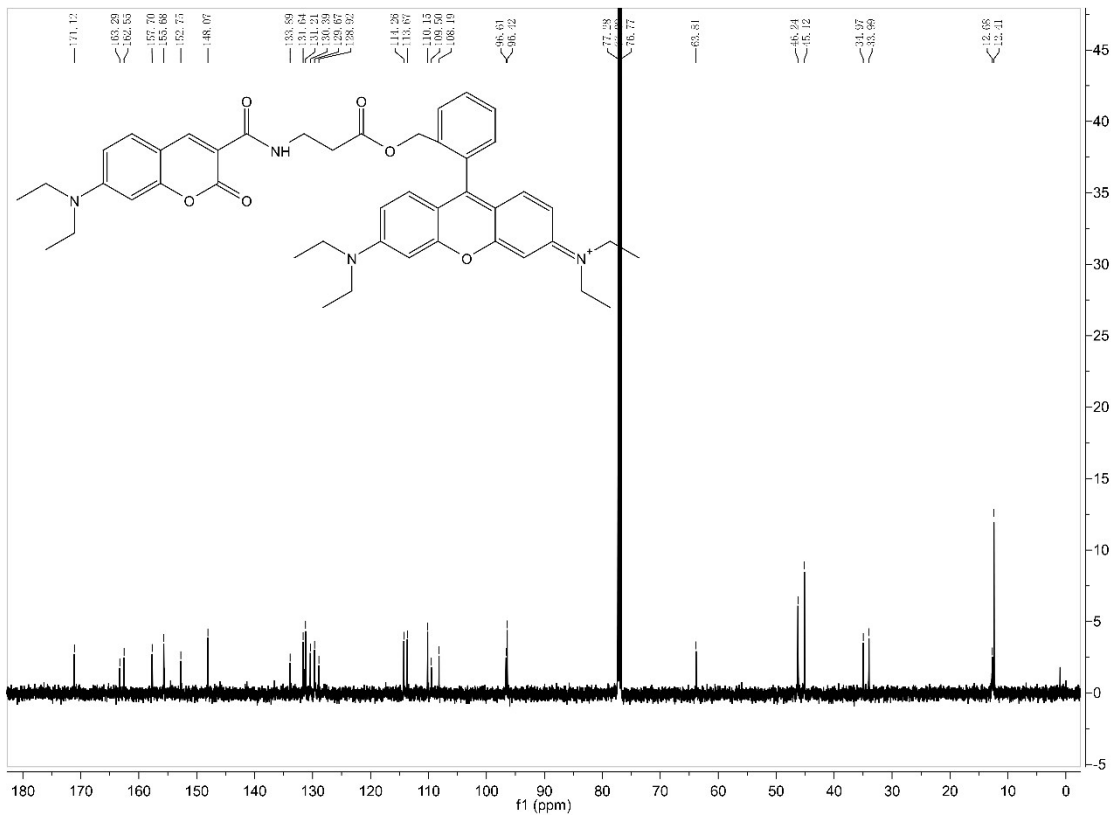

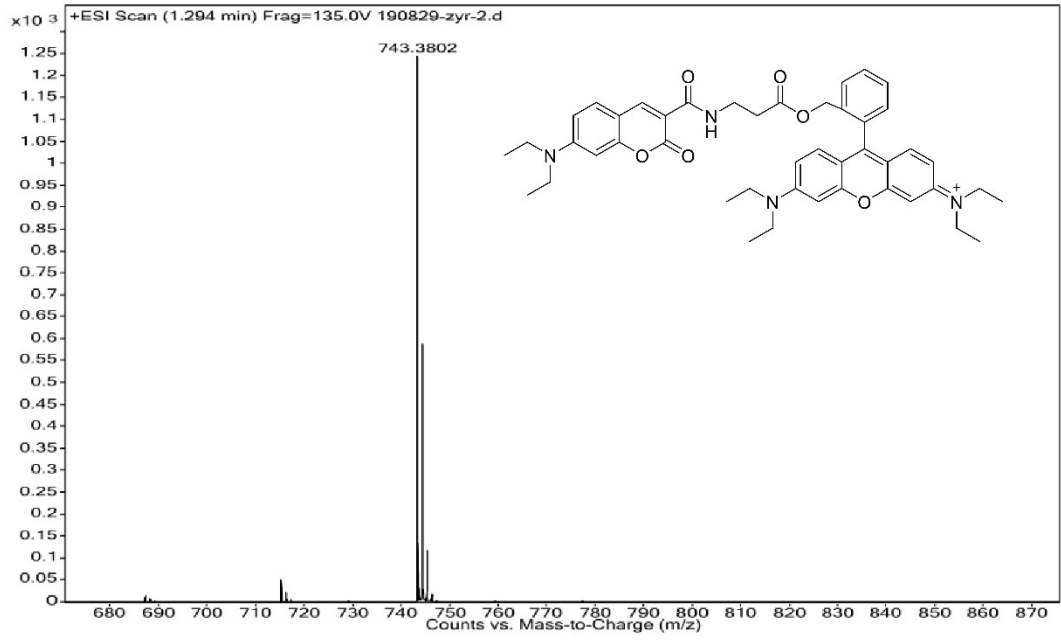

Supplement: d1nj01155c1.pdf [file d1nj01155c1.pdf]
